# Supplementary material
Source: publisher figshare collection journal article supplement (https://tandf.figshare.com/articles/dataset/_/11396871)
Supplement: Supplementary file 2 [file 2]

# Online Appendices to “Density Deconvolution with Additive Measurement Errors using Quadratic Programming”

## A1 Derivation of Eq. (9)

Recall that  $\hat{\mathbf{f}}_Y$  and  $\hat{\mathbf{f}}_Y^0$  are independent random vectors with a common mean  $\mathbf{C}\mathbf{f}_X$ . We can view  $\mathbf{C}\hat{\mathbf{f}}_{X,\lambda}$ , with  $\hat{\mathbf{f}}_{X,\lambda}$  the estimator from the QP approach, to be an estimator of this common mean. We write the SURE criterion as:

$$\begin{aligned}
 \mathbb{E}[Err] &= \mathbb{E} \left[ \|\hat{\mathbf{f}}_Y^0 - \mathbf{C}\hat{\mathbf{f}}_{X,\lambda}\|^2 \right] \\
 &= \mathbb{E} \left[ \|(\hat{\mathbf{f}}_Y^0 - \mathbf{C}\mathbf{f}_X) - (\hat{\mathbf{f}}_Y - \mathbf{C}\mathbf{f}_X) + (\hat{\mathbf{f}}_Y - \mathbf{C}\hat{\mathbf{f}}_{X,\lambda})\|^2 \right] \\
 &= \mathbb{E} \left[ \|\hat{\mathbf{f}}_Y^0 - \mathbf{C}\mathbf{f}_X\|^2 \right] + \mathbb{E} \left[ \|\hat{\mathbf{f}}_Y - \mathbf{C}\mathbf{f}_X\|^2 \right] + \mathbb{E} \left[ \|\hat{\mathbf{f}}_Y - \mathbf{C}\hat{\mathbf{f}}_{X,\lambda}\|^2 \right] \\
 &\quad - 2\mathbb{E} \left[ (\hat{\mathbf{f}}_Y^0 - \mathbf{C}\mathbf{f}_X)^T (\hat{\mathbf{f}}_Y - \mathbf{C}\mathbf{f}_X) \right] + 2\mathbb{E} \left[ (\hat{\mathbf{f}}_Y^0 - \mathbf{C}\mathbf{f}_X)^T (\hat{\mathbf{f}}_Y - \mathbf{C}\hat{\mathbf{f}}_{X,\lambda}) \right] \\
 &\quad - 2\mathbb{E} \left[ (\hat{\mathbf{f}}_Y - \mathbf{C}\mathbf{f}_X)^T (\hat{\mathbf{f}}_Y - \mathbf{C}\hat{\mathbf{f}}_{X,\lambda}) \right]. \tag{A1.16}
 \end{aligned}$$

Term by term in (A1.16), we have  $\mathbb{E} \left[ \|\hat{\mathbf{f}}_Y^0 - \mathbf{C}\mathbf{f}_X\|^2 \right] = \mathbb{E} \left[ \|\hat{\mathbf{f}}_Y - \mathbf{C}\mathbf{f}_X\|^2 \right]$  (because  $\hat{\mathbf{f}}_Y^0$  is defined as a random draw from the same distribution as  $\hat{\mathbf{f}}_Y$ );  $\mathbb{E} \left[ \|\hat{\mathbf{f}}_Y - \mathbf{C}\hat{\mathbf{f}}_{X,\lambda}\|^2 \right] = \mathbb{E}[err]$  (by definition of err); and  $\mathbb{E} \left[ (\hat{\mathbf{f}}_Y^0 - \mathbf{C}\mathbf{f}_X)^T (\hat{\mathbf{f}}_Y - \mathbf{C}\mathbf{f}_X) \right] = \mathbb{E} \left[ (\hat{\mathbf{f}}_Y^0 - \mathbf{C}\mathbf{f}_X)^T (\hat{\mathbf{f}}_Y - \mathbf{C}\hat{\mathbf{f}}_{X,\lambda}) \right] = 0$  (by the independence of  $\hat{\mathbf{f}}_Y^0$  and  $\hat{\mathbf{f}}_Y$ ). Consequently, (A1.16) reduces to:

$$\begin{aligned}
 \mathbb{E}[Err] &= \mathbb{E}[err] + 2 \left\{ \mathbb{E} \left[ (\hat{\mathbf{f}}_Y - \mathbf{C}\mathbf{f}_X)^T (\hat{\mathbf{f}}_Y - \mathbf{C}\mathbf{f}_X) \right] - \mathbb{E} \left[ (\hat{\mathbf{f}}_Y - \mathbf{C}\mathbf{f}_X)^T (\hat{\mathbf{f}}_Y - \mathbf{C}\hat{\mathbf{f}}_{X,\lambda}) \right] \right\} \\
 &= \mathbb{E}[err] + 2\mathbb{E} \left[ (\hat{\mathbf{f}}_Y - \mathbf{C}\mathbf{f}_X)^T (\mathbf{C}\hat{\mathbf{f}}_{X,\lambda} - \mathbf{C}\mathbf{f}_X) \right] \\
 &= \mathbb{E}[err] + 2\text{tr} \left[ \text{COV}(\mathbf{C}\hat{\mathbf{f}}_{X,\lambda}, \hat{\mathbf{f}}_Y) \right].
 \end{aligned}$$

The last equality follows even if  $\mathbb{E}[\hat{\mathbf{f}}_{X,\lambda}] \neq \mathbf{f}_X$ , because  $\hat{\mathbf{f}}_Y - \mathbf{C}\mathbf{f}_X$  is zero-mean.

## A2 Additional Figures

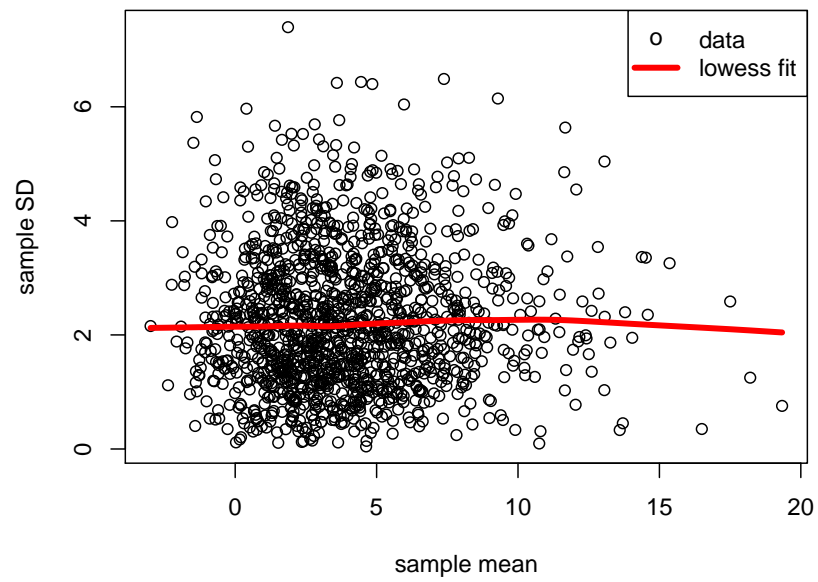

Figure A1: Plot of the sample standard deviations and the sample means in the sodium concentration example.

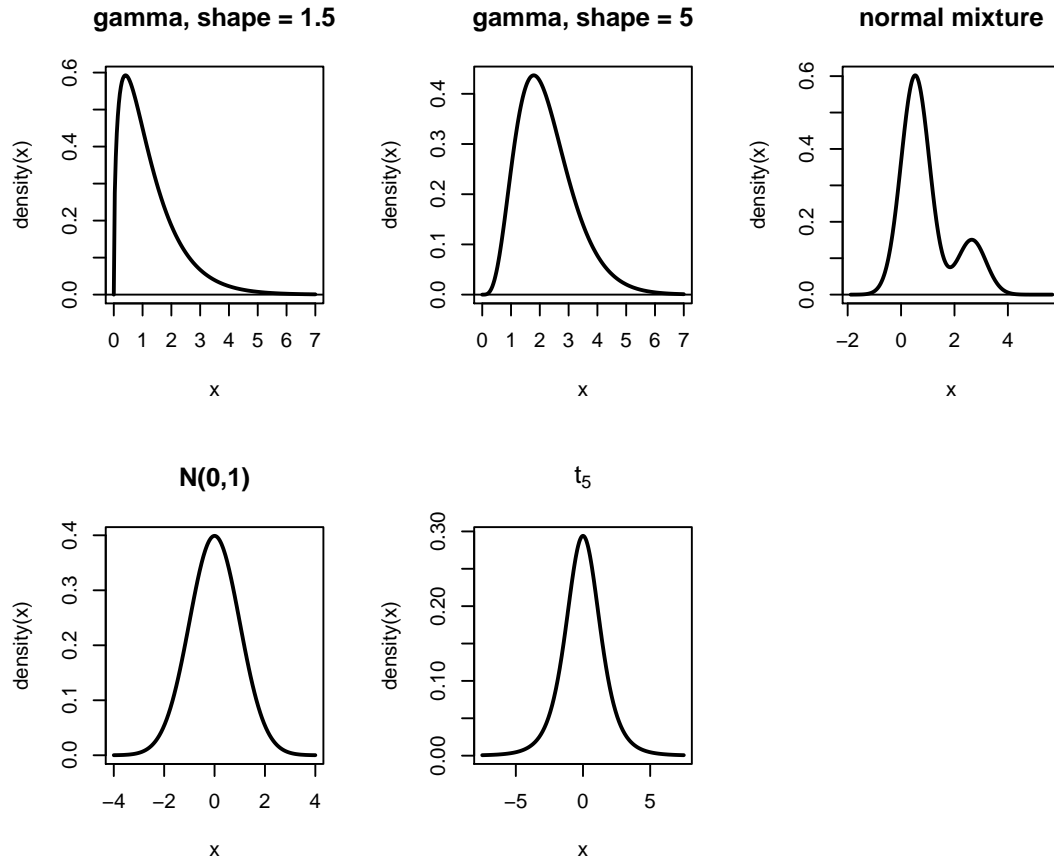

Figure A2: Densities of densities of  $X$  used in the simulation study. All of the distributions have variance equal to 1.

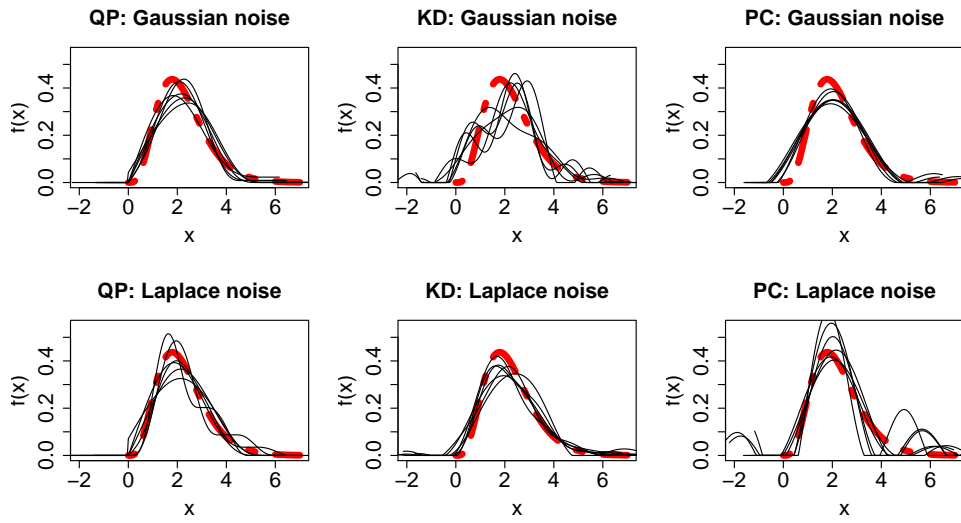

Figure A3: Simulations of  $\text{Gamma}(5)$ ,  $\sigma_z = 1$ ,  $n = 250$ . The true density is the dashed curve.

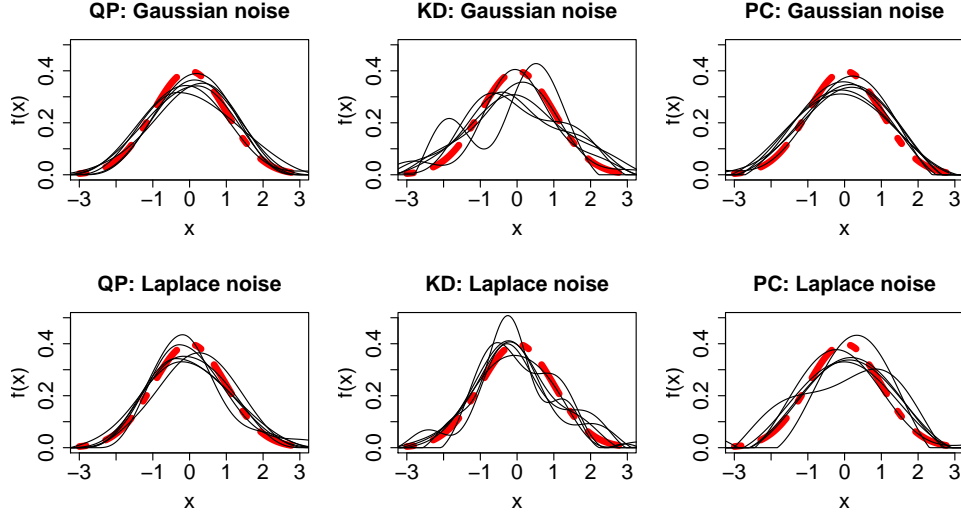

Figure A4: Simulations of  $N(0, 1)$ ,  $\sigma_z = 1$ ,  $n = 250$ . The true density is the dashed curve.

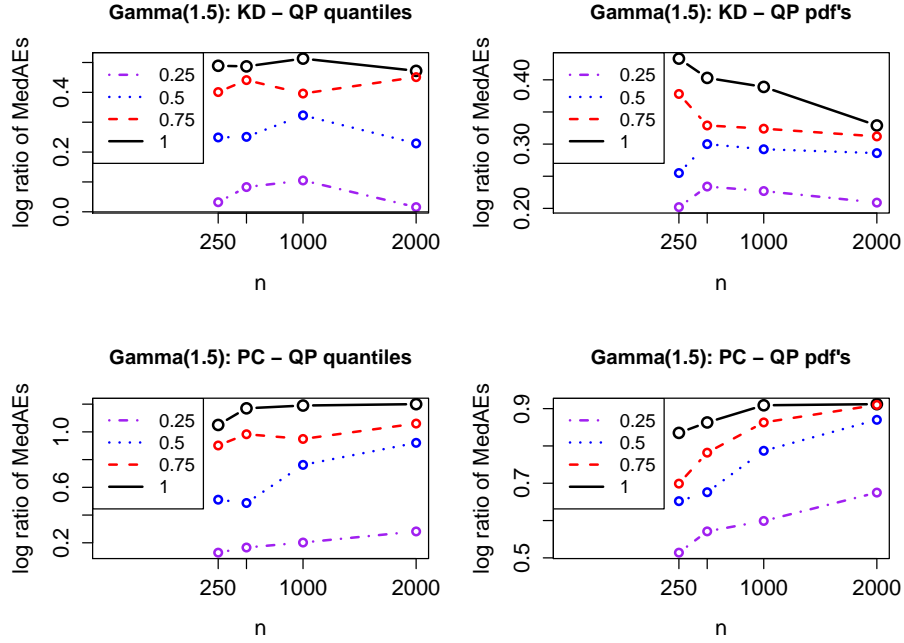

Figure A5: Log ratios for MedAEquant and MedAEpdf with  $f_x$  the Gamma(1.5) distribution and Laplace noise.  $\sigma_z$  is given in the legend.

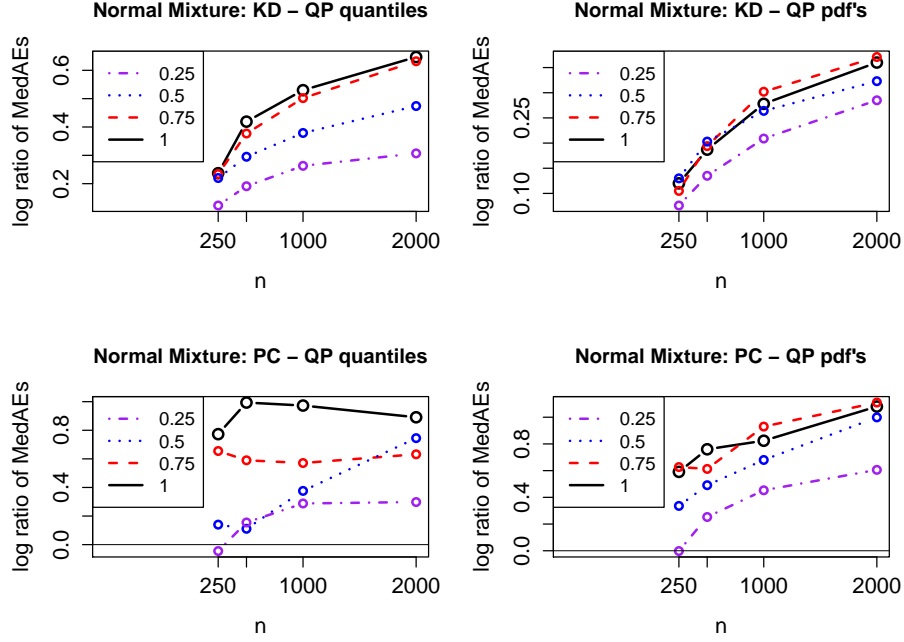

Figure A6: Log ratios for MedAEquant and MedAEpdf with a normal mixture distribution and  $f_Z$  Laplace.  $\sigma_z$  is given in the legend.

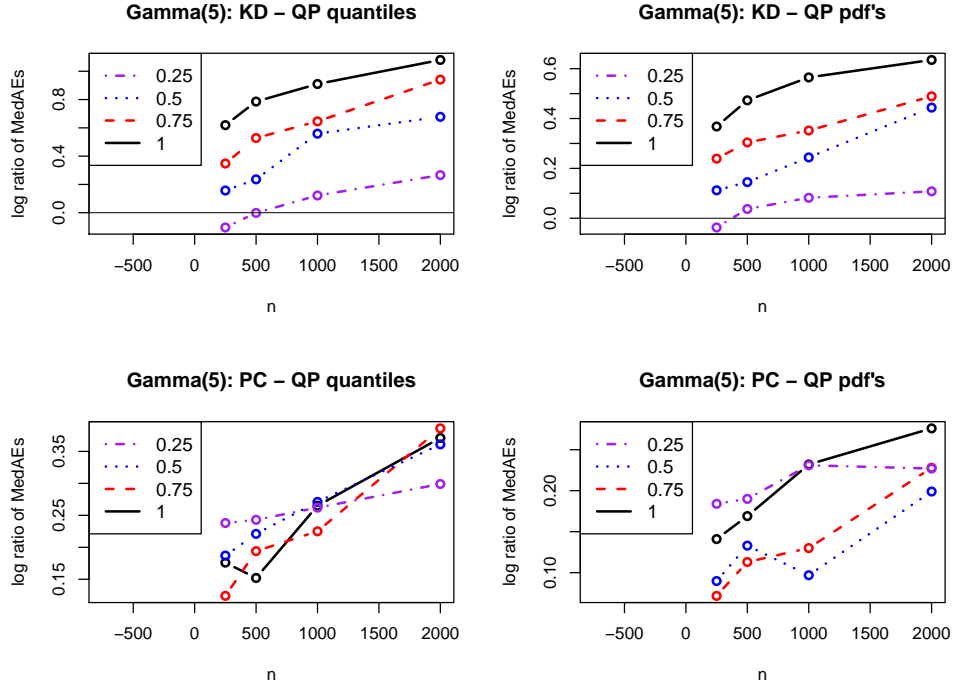

Figure A7: Log ratios for MedAEquant and MedAEpdf with  $f_X$  Gamma(5) and  $f_Z$  Gaussian.  $\sigma_z$  is given in the legend.

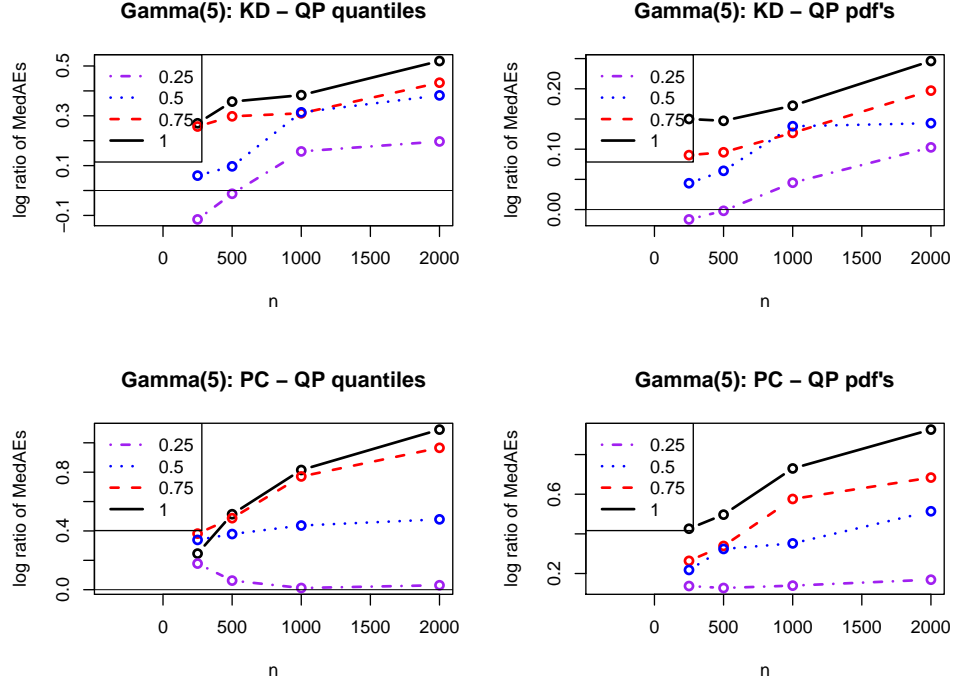

Figure A8: Log ratios for MAEquant and MAEpdf with  $f_X$  Gamma(5) and  $f_Z$  Laplace.  $\sigma_z$  is given in the legend.

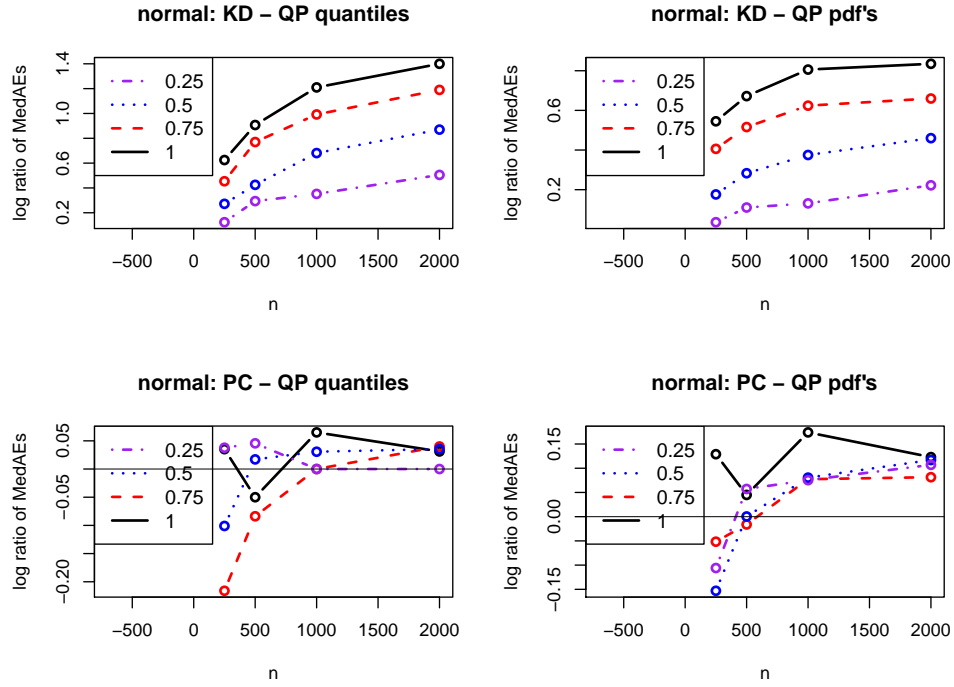

Figure A9: Log ratios for MedAEquant and MedAEpdf with  $f_X$  and  $f_Z$  both Gaussian.  $\sigma_z$  is given in the legend.

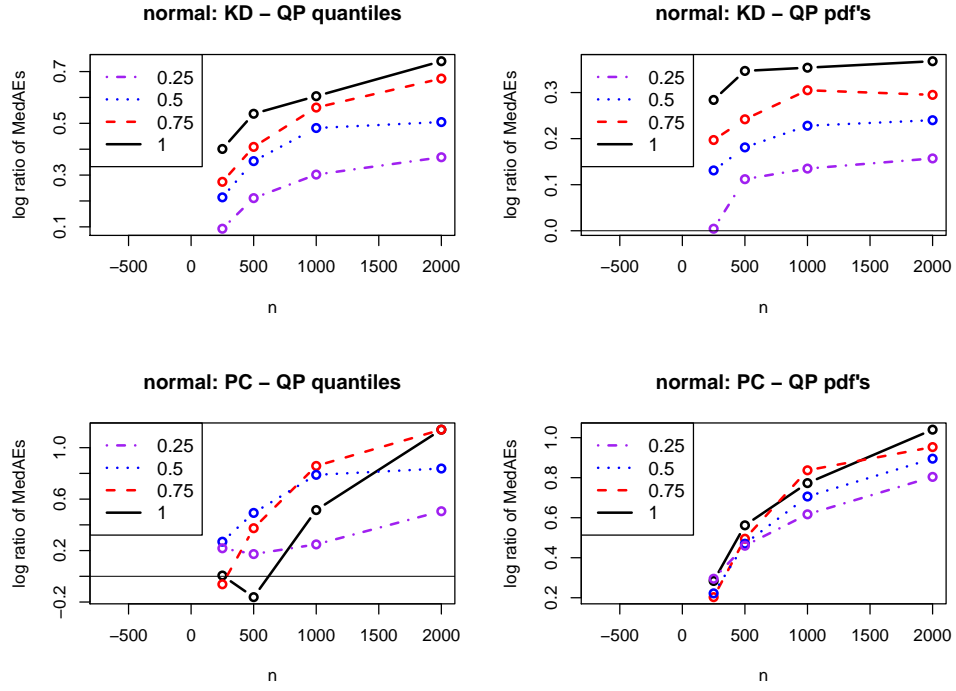

Figure A10: Log ratios for MedAEquant and MedAEpdf with  $f_X = \text{Gaussian}$  and  $f_Z = \text{Laplace}$ .  $\sigma_z$  is given in the legend.

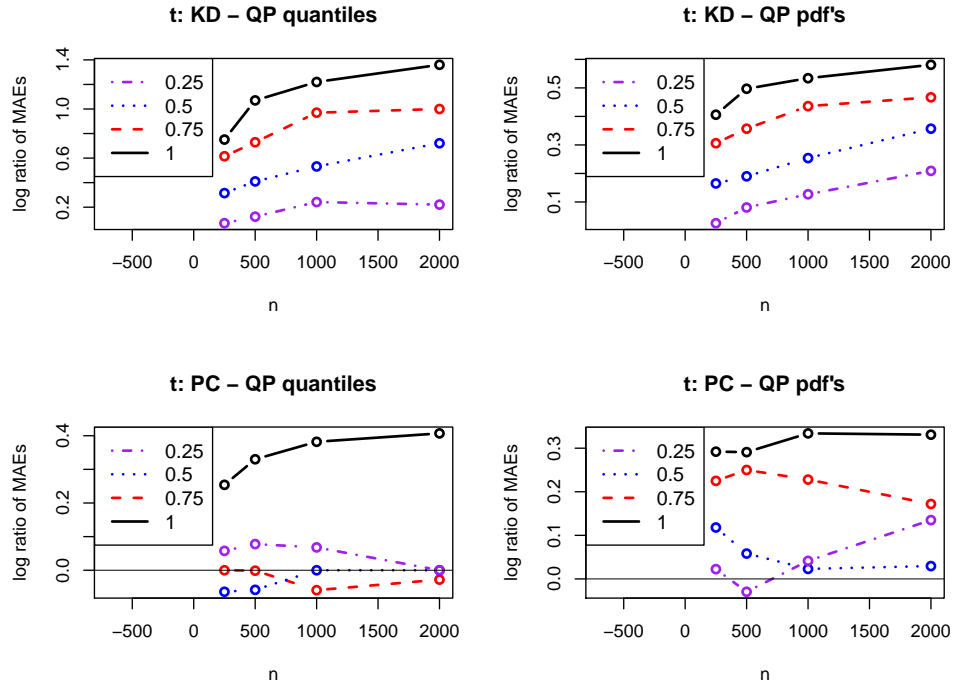

Figure A11: Log ratios for MedAEquant and MedAEpdf with  $f_X = t_5$  and  $f_Z = \text{Gaussian}$ .  $\sigma_z$  is given in the legend.



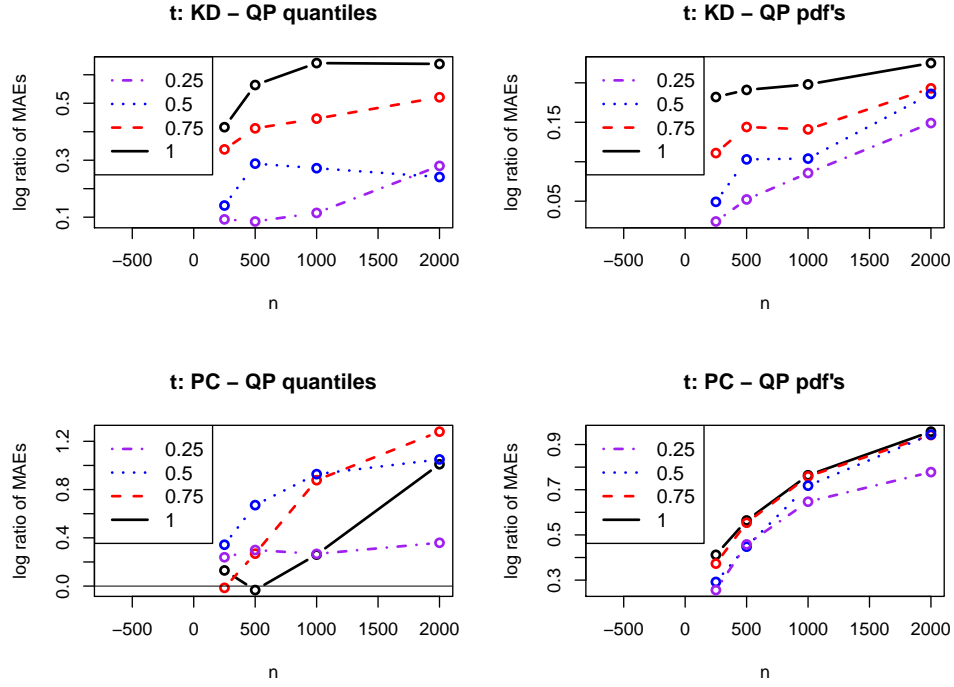

Figure A12: Log ratios for MedAEquant and MedAEpdf with  $f_X = t_5$  and  $f_Z = \text{Laplace}$ .  $\sigma_z$  is given in the legend.

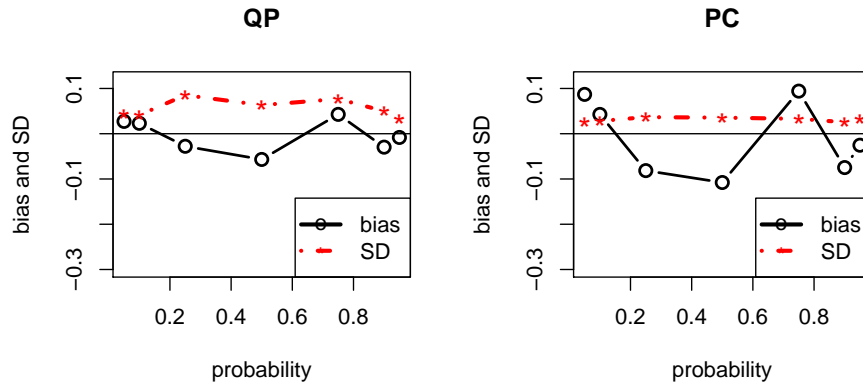

Figure A13: Bias and standard deviation of the QP and PC estimates of  $f_X$  at quantiles corresponding to the probability on the x-axis.  $f_X$  is a normal mixture. The sample size is 1000,  $\sigma_z = 0.75$ , and  $f_Z$  is Gaussian.

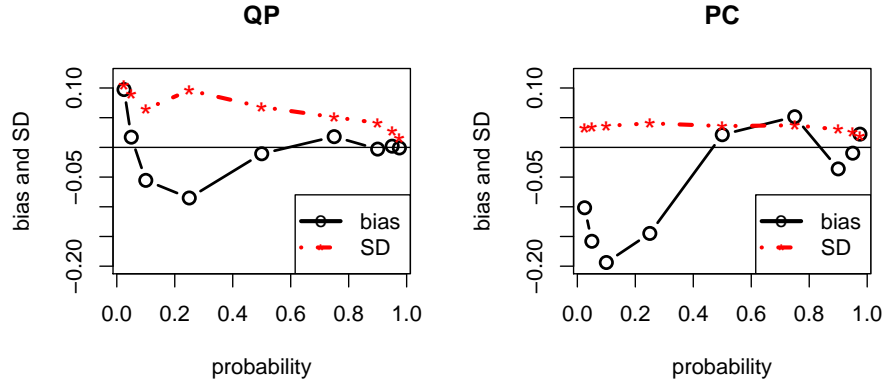

Figure A14: Bias and standard deviation of the QP and PC estimates of  $f_X$  at quantiles corresponding to the probability on the x-axis.  $f_X$  is Gamma(1.5). The sample size is 1000,  $\sigma_z = 0.75$ , and  $f_Z$  is Gaussian.

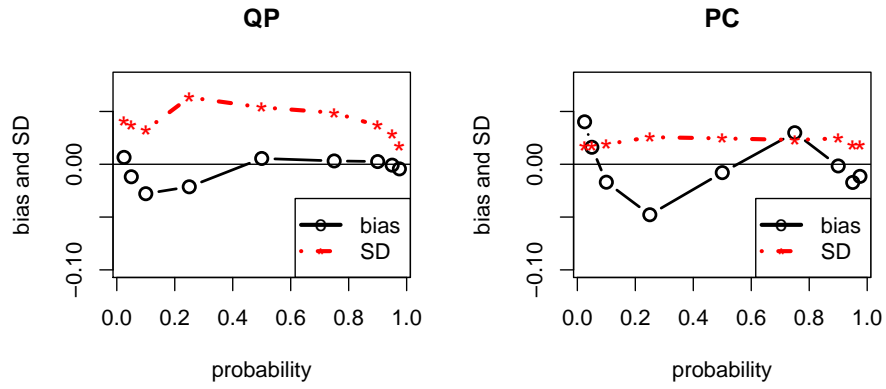

Figure A15: Bias and standard deviation of the QP and PC estimates of  $f_X$  at quantiles corresponding to the probability on the x-axis.  $f_X$  is Gamma(5). The sample size is 1000,  $\sigma_z = 0.75$ , and  $f_Z$  is Gaussian.

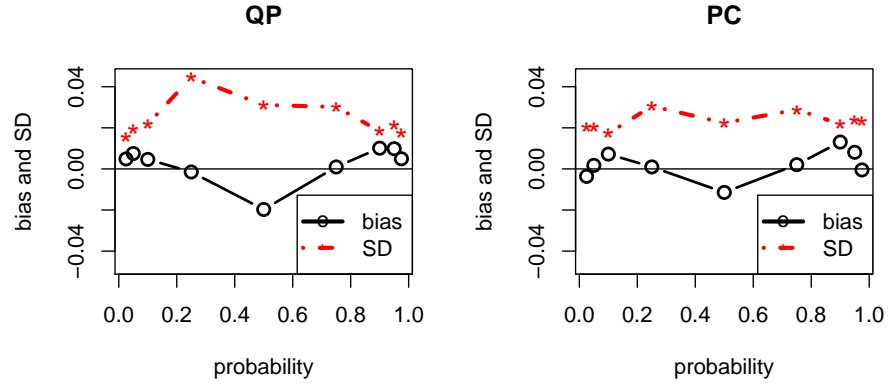

Figure A16: Bias and standard deviation of the QP and PC estimates of  $f_X$  at quantiles corresponding to the probability on the x-axis.  $f_X$  is  $N(0, 1)$ . The sample size is 1000,  $\sigma_z = 0.75$ , and  $f_Z$  is Gaussian.

## A3 Tables

| $n$     | $\sigma_z$ | lower limit | upper limit | length |
|---------|------------|-------------|-------------|--------|
| 250.00  | 0.25       | 0.08        | 0.19        | 0.11   |
| 250.00  | 0.50       | 0.39        | 0.51        | 0.12   |
| 250.00  | 0.75       | 0.68        | 0.81        | 0.13   |
| 250.00  | 1.00       | 0.95        | 1.09        | 0.14   |
| 500.00  | 0.25       | 0.07        | 0.19        | 0.12   |
| 500.00  | 0.50       | 0.43        | 0.55        | 0.12   |
| 500.00  | 0.75       | 0.69        | 0.82        | 0.13   |
| 500.00  | 1.00       | 1.03        | 1.16        | 0.14   |
| 1000.00 | 0.25       | 0.09        | 0.20        | 0.11   |
| 1000.00 | 0.50       | 0.48        | 0.59        | 0.11   |
| 1000.00 | 0.75       | 0.95        | 1.06        | 0.11   |
| 1000.00 | 1.00       | 1.14        | 1.27        | 0.13   |
| 2000.00 | 0.25       | 0.16        | 0.28        | 0.12   |
| 2000.00 | 0.50       | 0.61        | 0.72        | 0.10   |
| 2000.00 | 0.75       | 0.89        | 1.00        | 0.11   |
| 2000.00 | 1.00       | 1.19        | 1.30        | 0.11   |

Table A1: Lower and upper limits of 95%  $BC_a$  confidence intervals for the KD/PC log-ratios for quantile-MedAEs in Figure 9, upper-left panel. The intervals were created by the function **bcanon()** in the **bootstrap** package and used 5000 resamples. The final column contains the lengths of the intervals.

| n       | $\sigma_z$ | lower limit | upper limit | length |
|---------|------------|-------------|-------------|--------|
| 250.00  | 0.25       | 0.21        | 0.27        | 0.06   |
| 250.00  | 0.50       | 0.45        | 0.53        | 0.08   |
| 250.00  | 0.75       | 0.65        | 0.74        | 0.09   |
| 250.00  | 1.00       | 0.80        | 0.89        | 0.10   |
| 500.00  | 0.25       | 0.22        | 0.27        | 0.05   |
| 500.00  | 0.50       | 0.47        | 0.53        | 0.06   |
| 500.00  | 0.75       | 0.64        | 0.73        | 0.09   |
| 500.00  | 1.00       | 0.81        | 0.91        | 0.10   |
| 1000.00 | 0.25       | 0.21        | 0.26        | 0.05   |
| 1000.00 | 0.50       | 0.41        | 0.48        | 0.06   |
| 1000.00 | 0.75       | 0.67        | 0.75        | 0.08   |
| 1000.00 | 1.00       | 0.79        | 0.88        | 0.09   |
| 2000.00 | 0.25       | 0.22        | 0.28        | 0.05   |
| 2000.00 | 0.50       | 0.39        | 0.45        | 0.06   |
| 2000.00 | 0.75       | 0.58        | 0.67        | 0.08   |
| 2000.00 | 1.00       | 0.74        | 0.83        | 0.09   |

Table A2: Lower and upper limits of 95%  $BC_a$  confidence intervals for the KD/PC log-ratios of pdf-MedAEs in Figure 9, upper-right panel. The intervals were created by the function **bcanon()** in the **bootstrap** package and used 5000 resamples. The final column contains the lengths of the intervals.
